# Supplementary material
Source: ML conference proceedings conference paper supplement (https://openaccess.thecvf.com/content/ICCV_2017/html/Nguatem_Modeling_Urban_Scenes_ICCV_2017_paper.html)

## Evaluation Setup

Currently, there are no benchmarks on this line of research because the generation of ground-truth for outdoor scenes still requires immense manual labor. We develop the setup of Figure 10(A), also shown below to evaluate MUSP.

The idea is to systematically modify the input pointcloud by, e.g., additive Gaussian noise, and compare the output from MUSP at different noise levels by computing the intersection-over-union (IoU) volumes (Jaccard Coefficient).

Our test dataset below is from SfM/MVS and contains 20 million 3D-points. The data captures a gable roofed building and its immediate surroundings. First we model the scene with MUSP and compute the textured model from the resulting polygons. By visual inspection, the texture map shows a pleasant results therefore we consider this as the ground-truth. In Figure 12, the effects of adding zero mean Gaussian noise to the points in the test data on MUSP is shown.

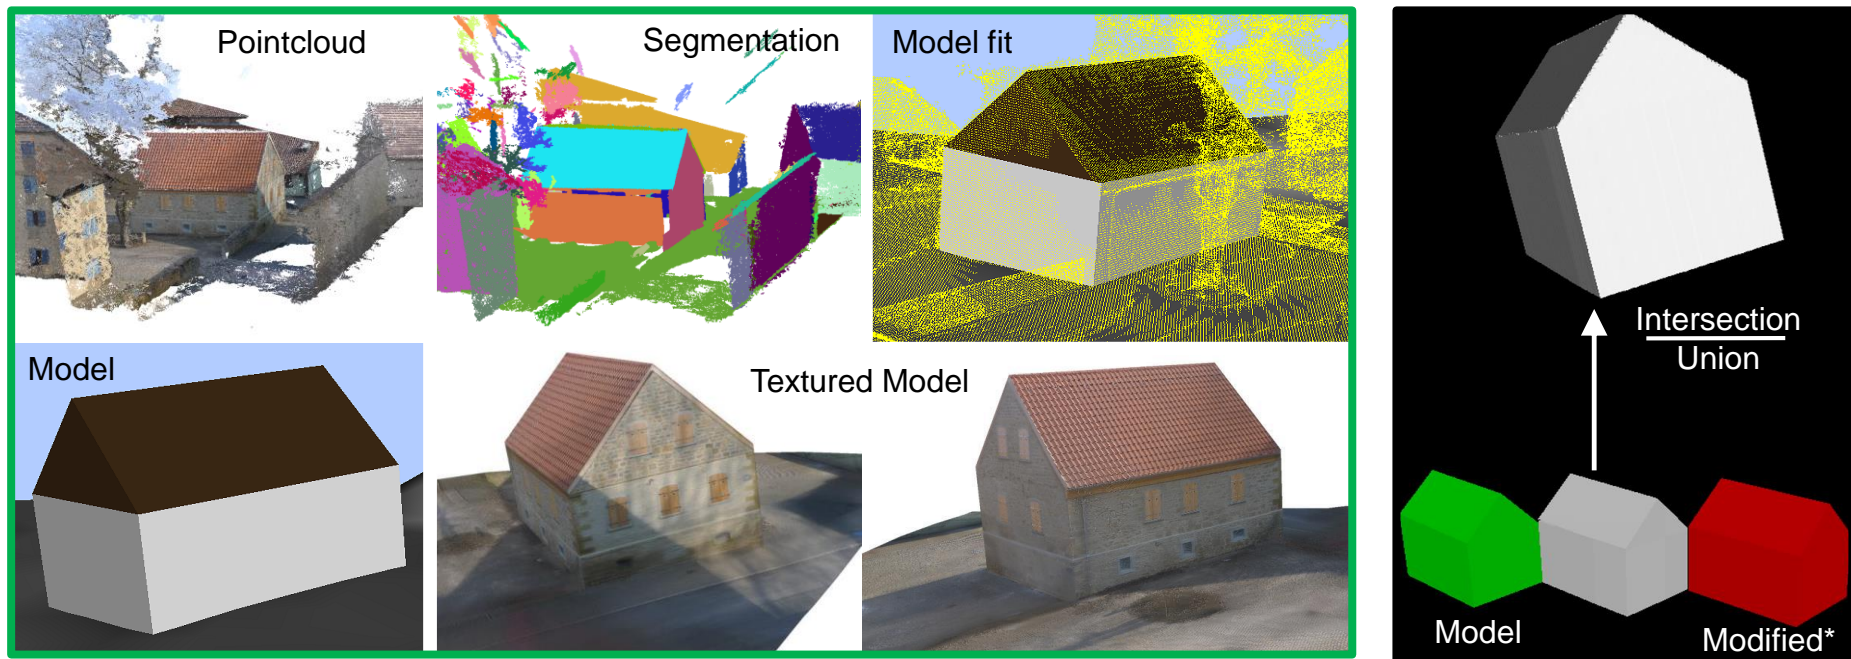

Figure 11. In the absence of benchmark data sets as well as “true” ground truth, we use this input data from SfM/MVS as an artificial “ground truth” to analyse the modeling performance on additive noise.

## Effects of Additive noise on MUSP

Under additive Gaussian noise, with increasing variance (VAR), MUSP can successfully model the simple gable roof building. Meanwhile, beyond a VAR=0.6, the segmentation completely fails by producing many more segments as present in the scene. This leads to failing of the modeling into consistent polygons as shown below on the right hand side (red rectangular) of Figure 11.

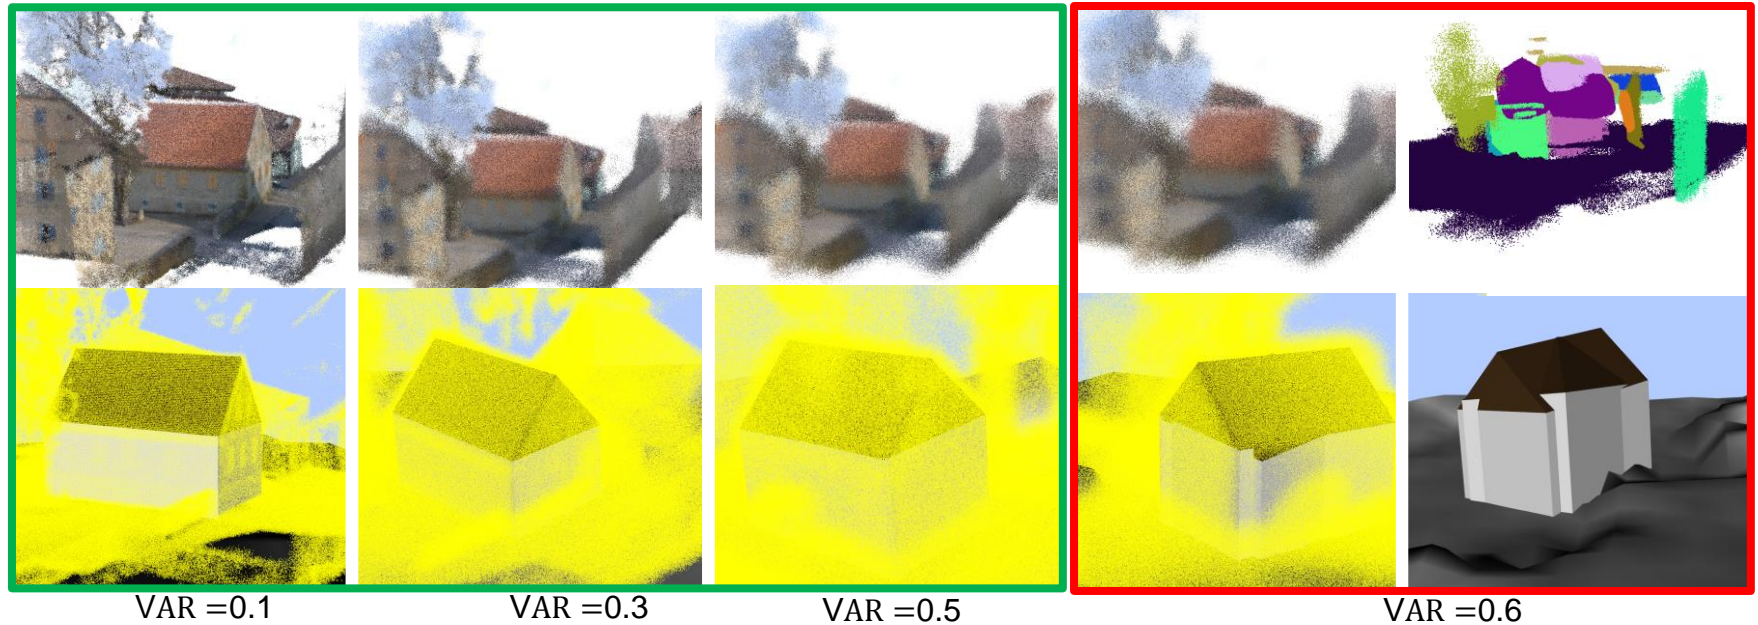

Figure 11. Modeling under additive Gaussian noise on every point with variance(VAR) 0.1, 0.3, 0.5, 0.6

Furthermore, we created a synthetic urban scene with 6 buildings (3 with gable, 2 flat, 1 hip roofs) of different sizes and known dimensions. The scene has a flat terrain and all buildings have vertical facades. We sampled the scene and created pointclouds from it as ground truth. Similar to the test above, we create 6 test sets by adding Gaussian noise on every point with variance(VAR) 0.1, 0.3, 0.35, 0.4, 0.45, 0.5. Finally, we ran our modeling algorithm (MUSP) on these test data at increasing noise level, and compare the output against the synthetic ground truth by computing the intersection-over-union (IoU) volumes (Jaccard Coefficient), averaged over all 6 buildings. We achieved:

IoU at VAR 0.1 is 0.982, IoU at VAR 0.3 is 0.954, IoU at VAR 0.35 is 0.933, IoU at VAR 0.4 is 0.904, IoU at VAR 0.45 is 0.882. Adding Gaussian noise to 3D points makes the underlying surface more and more swollen. At VAR of 0.5, the surfaces become non-identifiable and our segmentation fails.

## Effects of Incomplete Data on MUSP

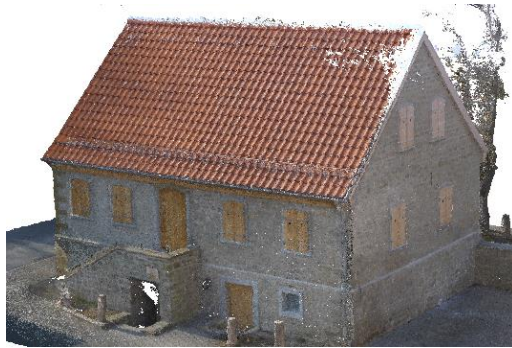

Unmodified  
Pointcloud

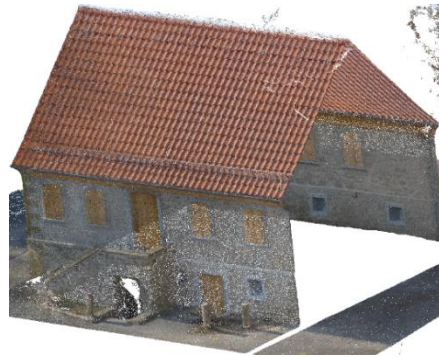

1 Facade Manually  
Segmented

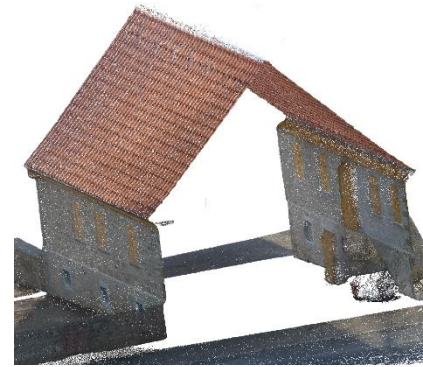

2 Facades Manually  
Segmented

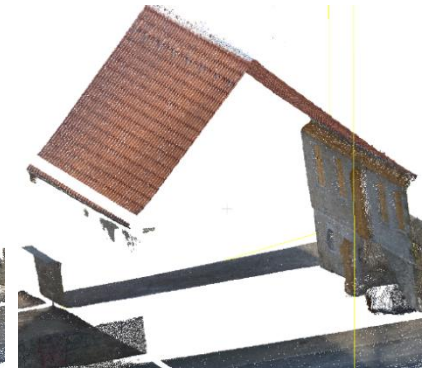

3 Facades Manually  
Segmented

To evaluate the robustness of MUSP against missing data, we first remove a facade polygon on each building of our synthetically created urban scene, and sampled pointclouds from the remaining polygons. The resulting modified pointclouds reflects the present of missing data as can be seen in the examples above after manually segmenting facades from the pointclouds from SfM shown in Figure 11.

Similarly, we create 6 test set on this modified synthetic data. We achieve the following IoU against the unmodified original synthetic data:

IoU at VAR 0.1 is 0.962, IoU at VAR 0.3 is 0.934, IoU at VAR 0.35 is 0.910, IoU at VAR 0.4 is 0.860, IoU at VAR 0.45 is 0.835

Finally, we remove two adjacent facades on each building and create 6 test sets as explained above.

We achieved:

IoU at VAR 0.1 is 0.924, IoU at VAR 0.3 is 0.902, IoU at VAR 0.35 is 0.862, IoU at VAR 0.4 is 0.831, IoU at VAR 0.45 is 0.760

This substantiates our use of priors on architectural scenes for modeling, to enforce robustness against missing data.

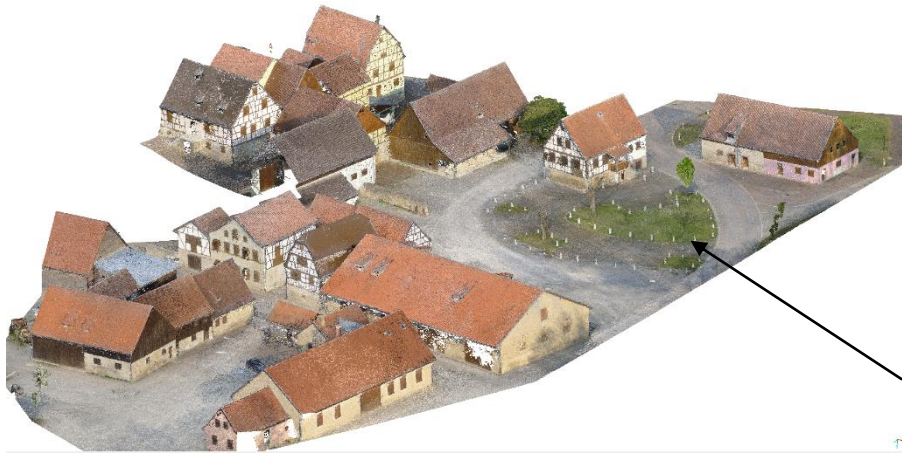

Input Data\_1: 67M. noisy 3D points from SfM/MVS of a residential area with a relatively „near“ planar terrain. MUSP segments the scene into patches. The ground is the patch with the largest convex hull area (red).

Runtime of complete workflow:  
30mins on an Intel i7 machine, current code not yet optimized

Modeling the ground with NURBS captures even small non-planarities where present. For this relatively planar terrain, the vegetation and the natural ground account for a small non-planarity.

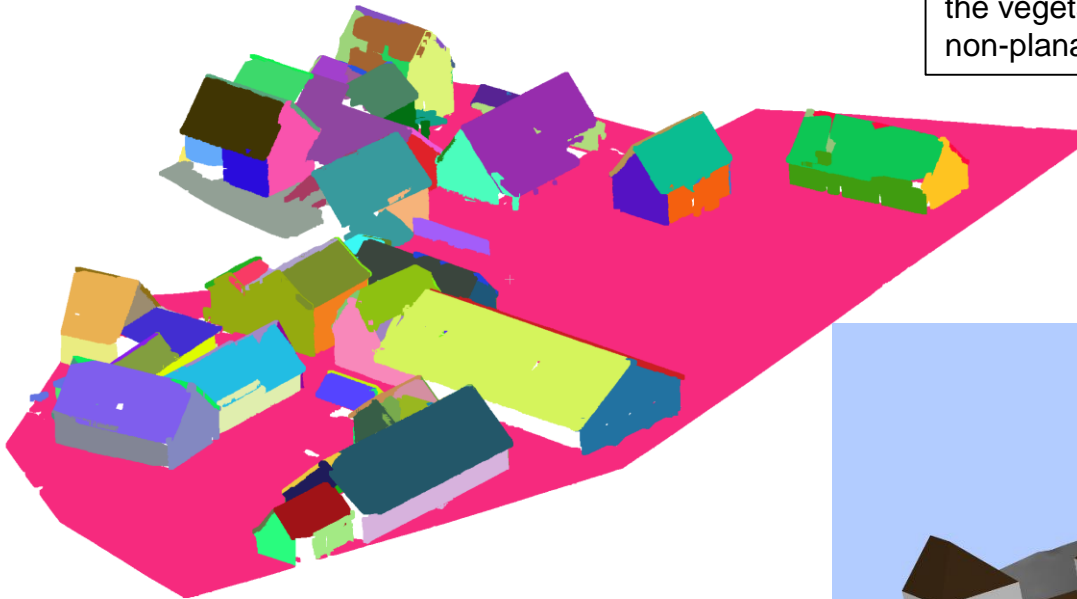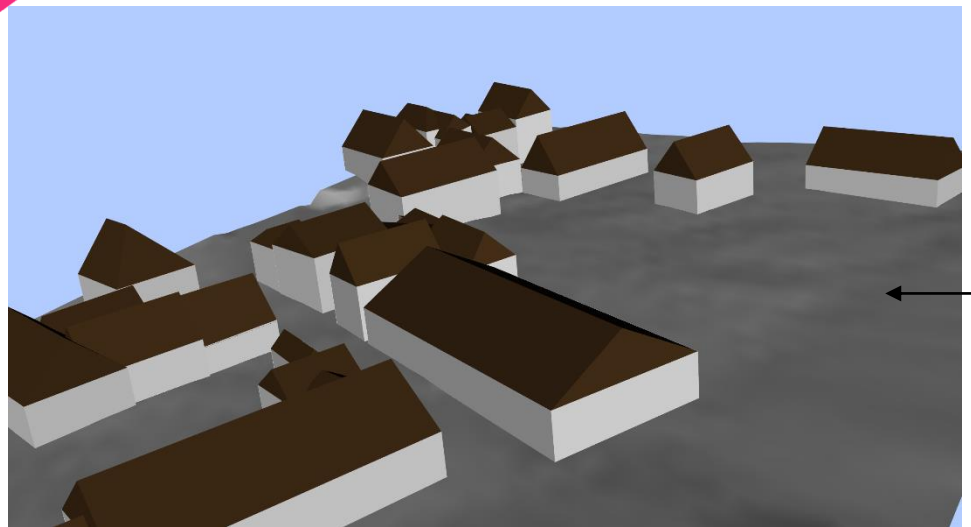

Dataset „markt“. Input 36M. noisy 3D points from SfM/MVS. Model fit for residential rural area with more than 5 buildings accurately modeled. Runtime: 25 mins, current code not yet optimized

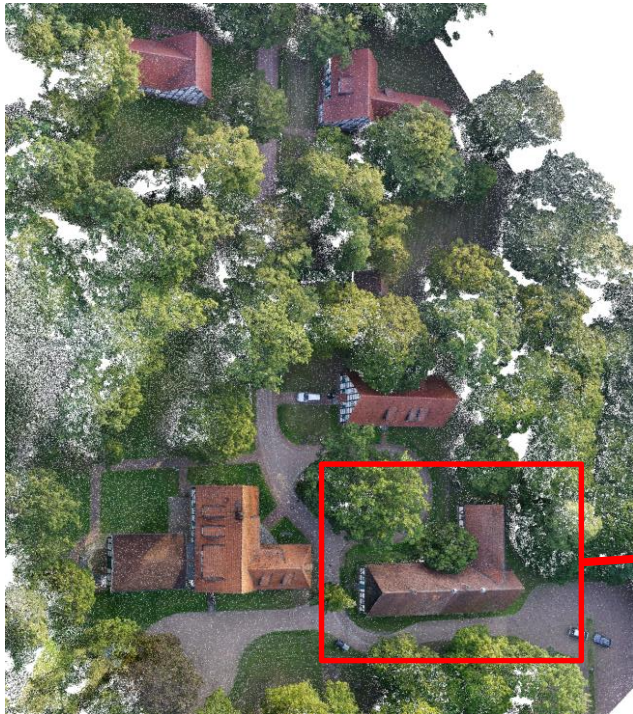

Input cloud from SfM/MVS

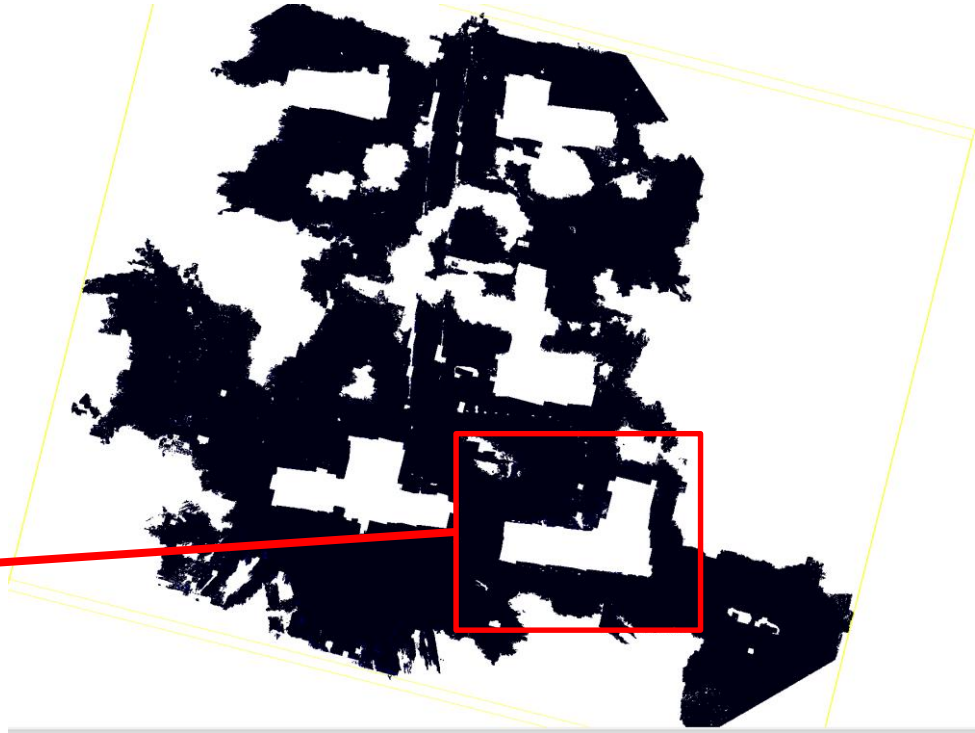

Extracted Ground:

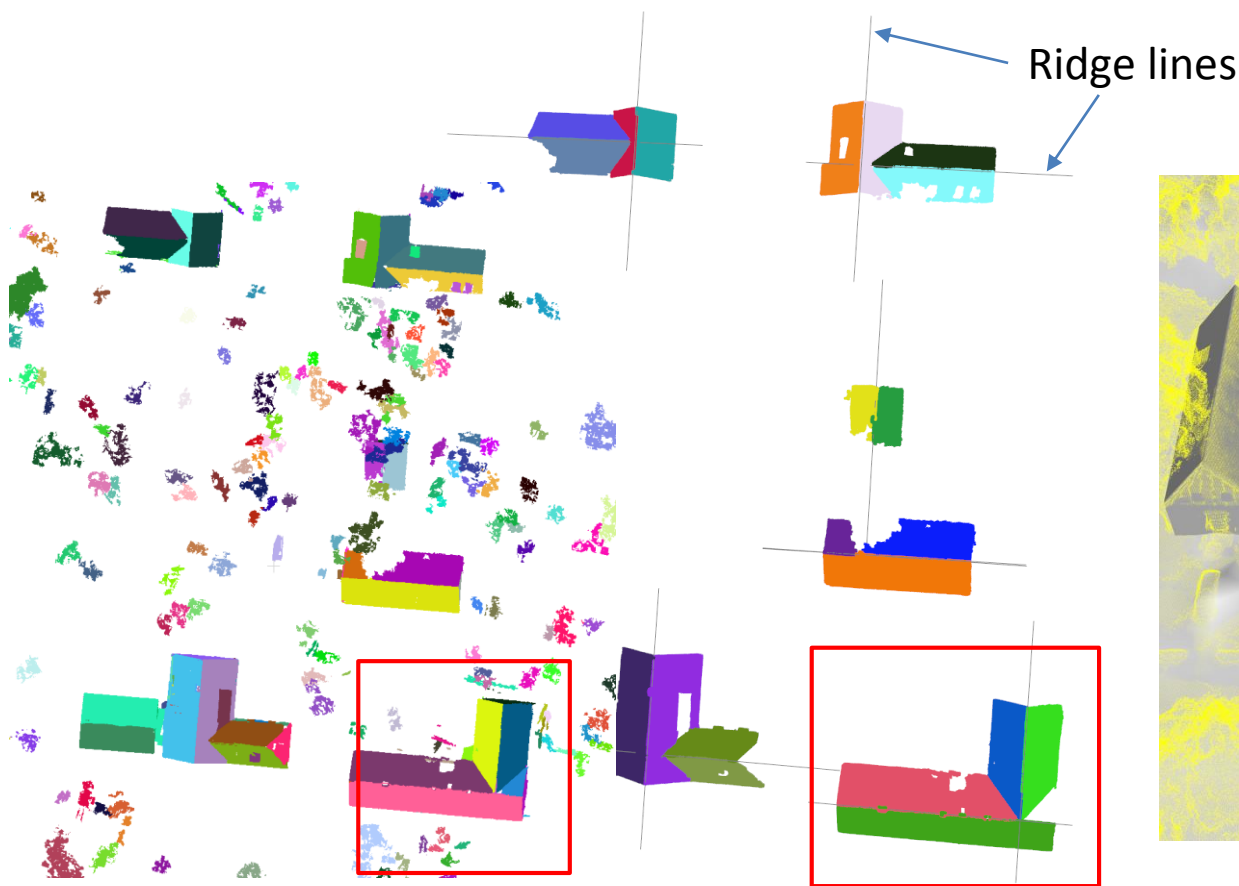

Segmentation

Detected Roofs

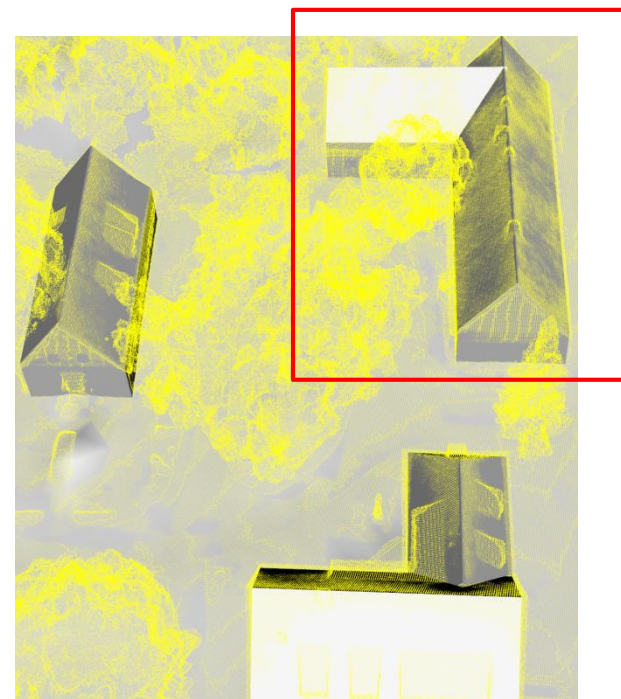

Model Fit

Model fit shows robustness against vegetation

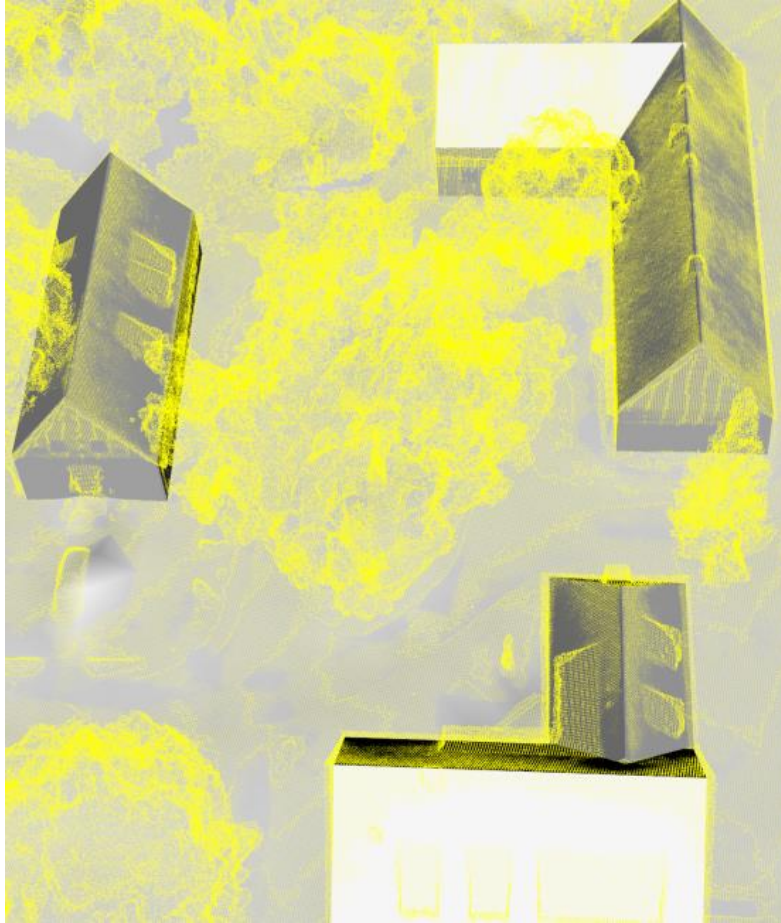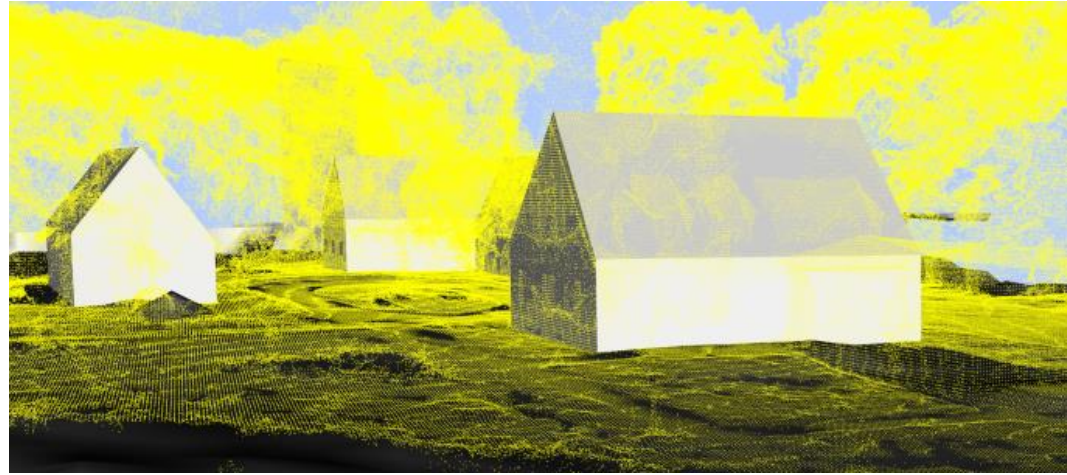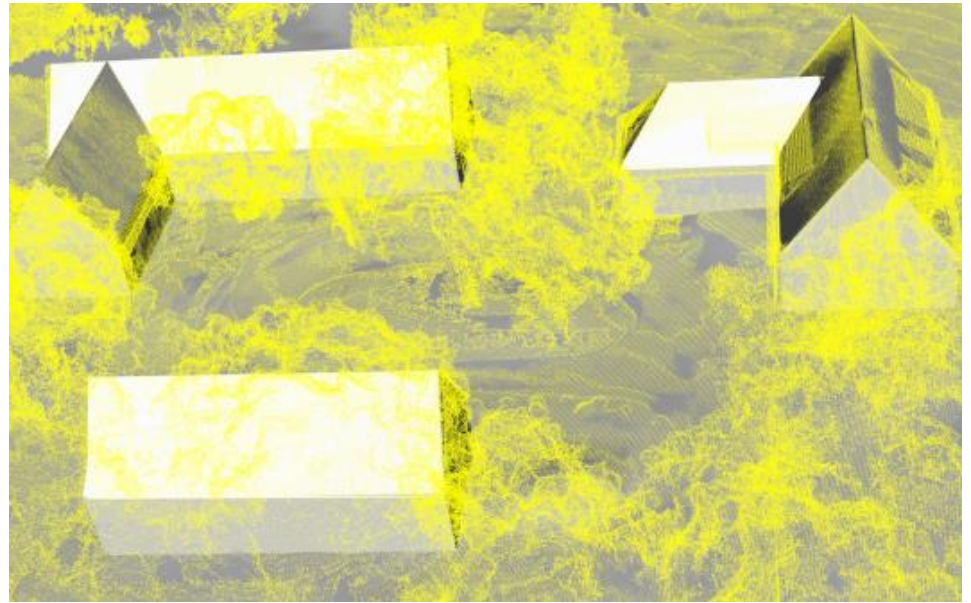

"lans" datasets, courtesy of [1]. 3D points from LIDAR

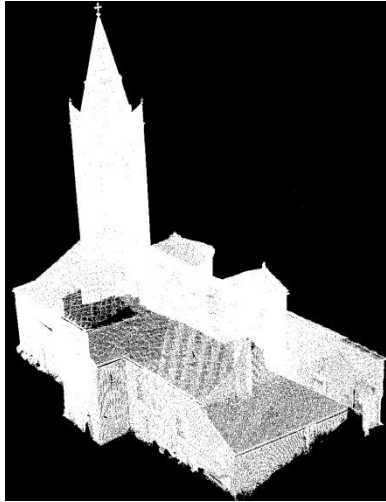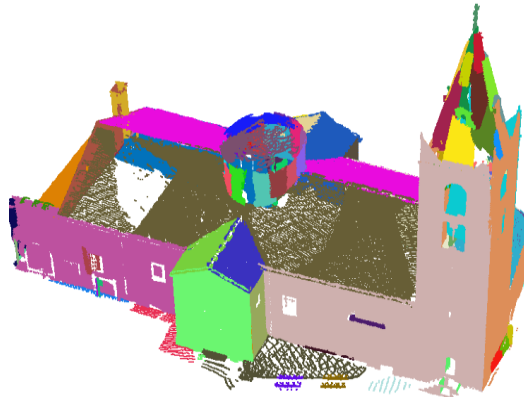

Segmentation

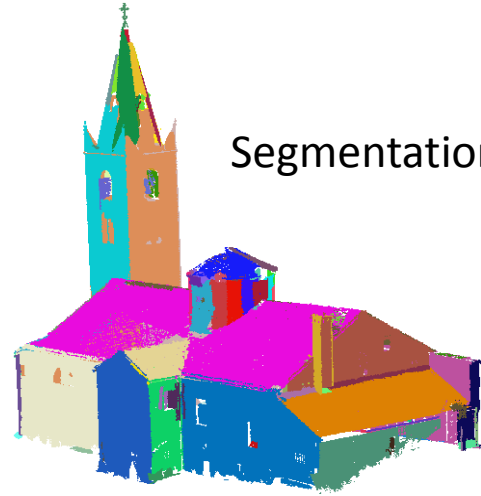

Segmentation

[1] Lafarge, F., Alliez, P.: Surface reconstruction through point set structuring. In: 295 296 Proc. of Eurographics. Girona, Spain (2013)

## Polygon Sweeping:

The input points (green) is used to score the polygon at each discrete step.  
The score is evaluated in an MSAC style using the inliers (red).  
Here, the best polygon for a facade is found in (4).

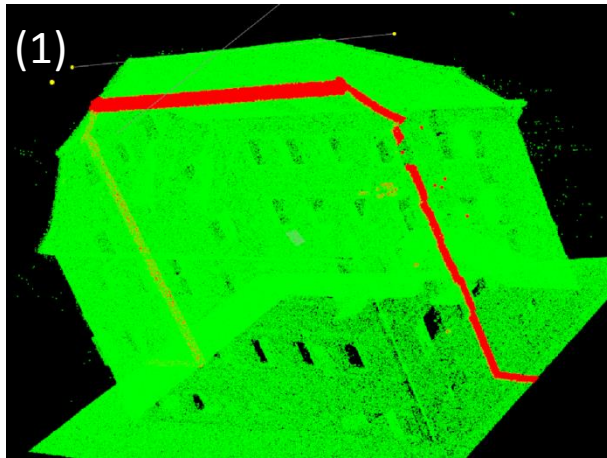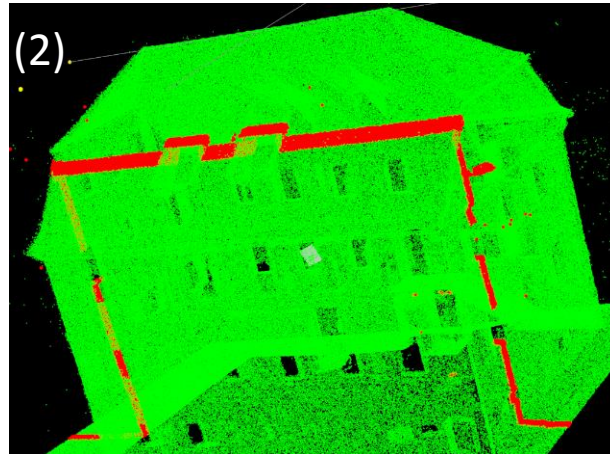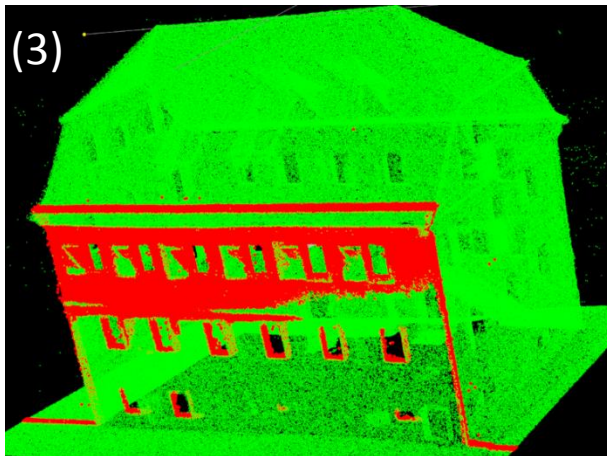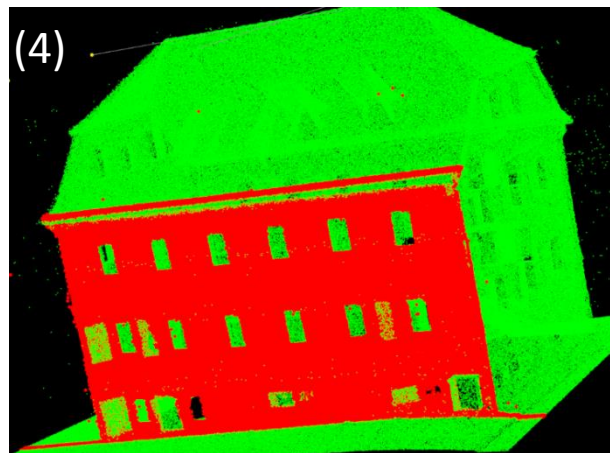

## Facade protrusions beyond the ground

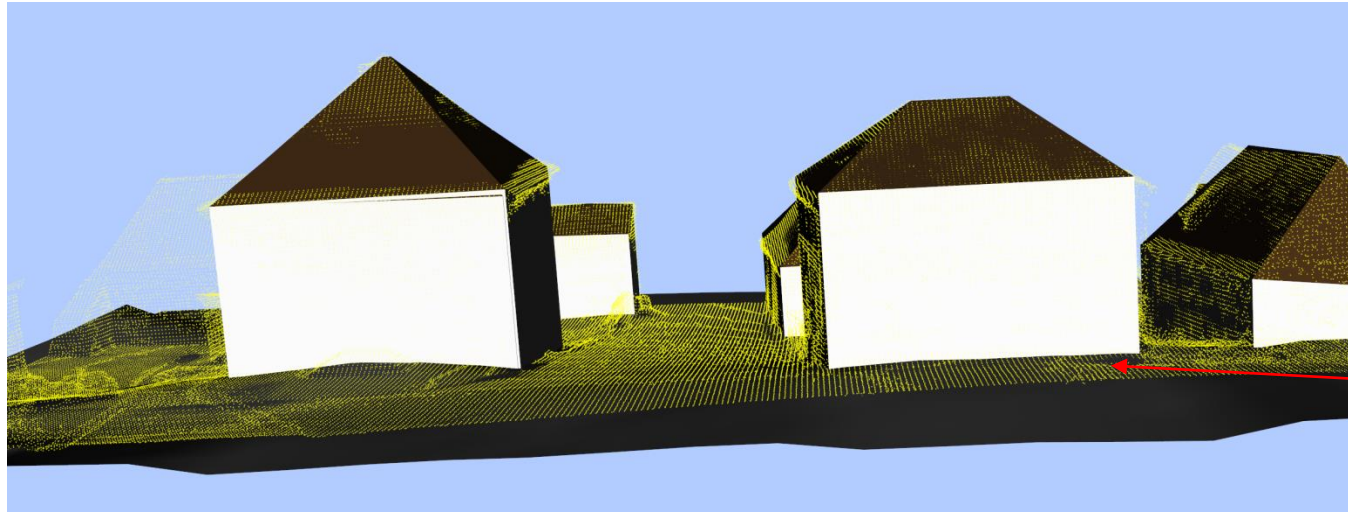

NURBS  
modeling of  
non-planar  
terrain

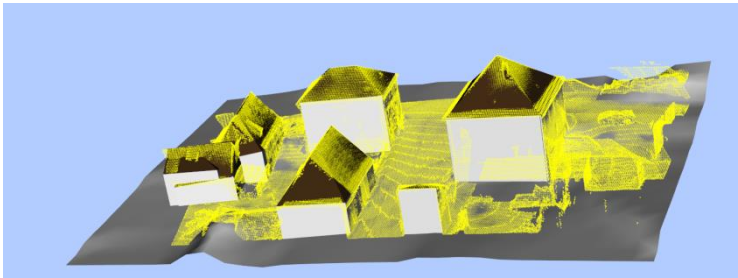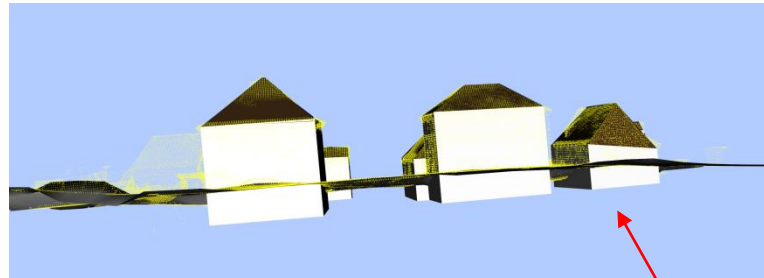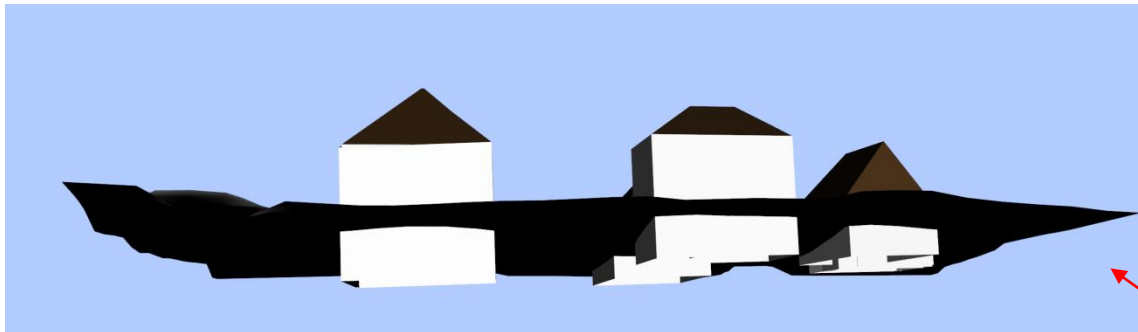

Untrimmed facades extends  
beyond the ground surface

Boolean algebra on geometry is used to adjust the facades

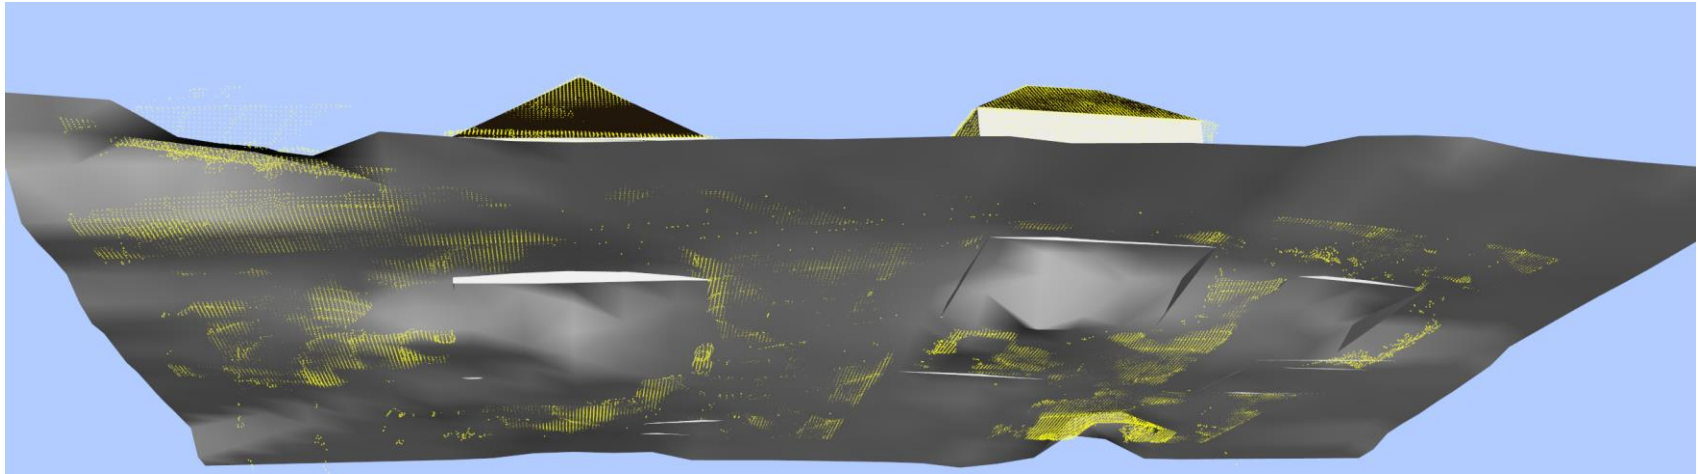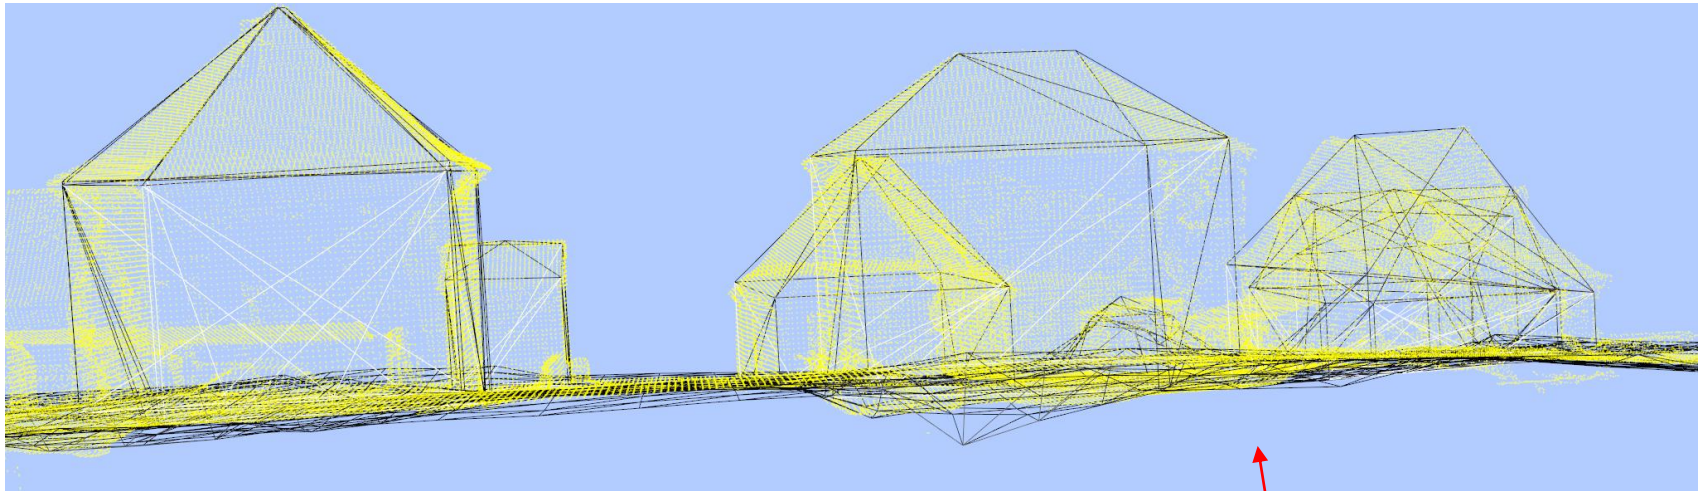

Facades trimmed on the  
ground surface  
(wireframe mode)

### Trimming of facades on the detected ground surface (III)

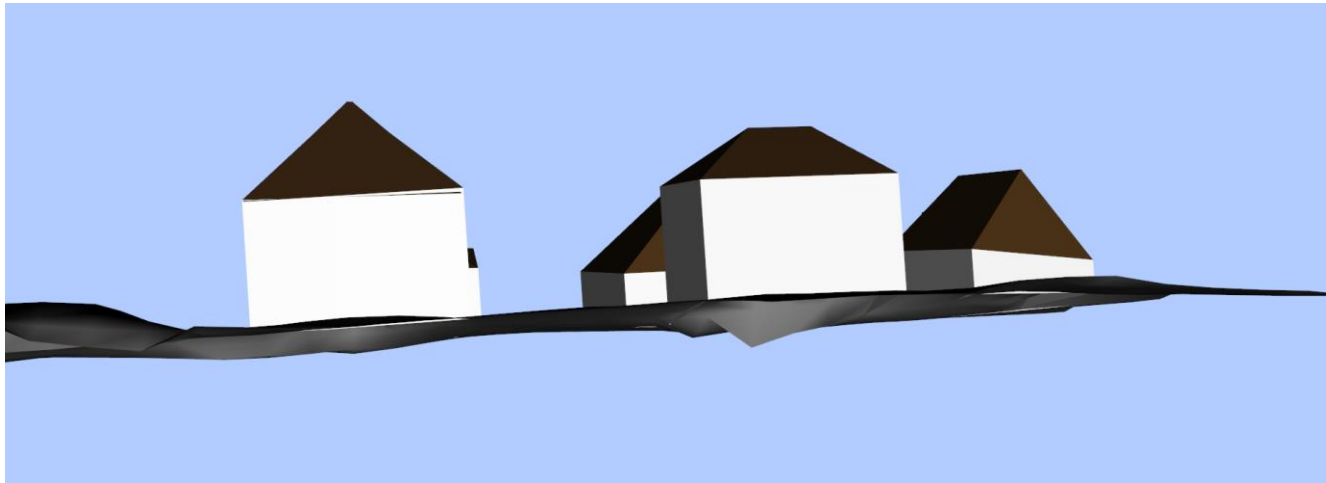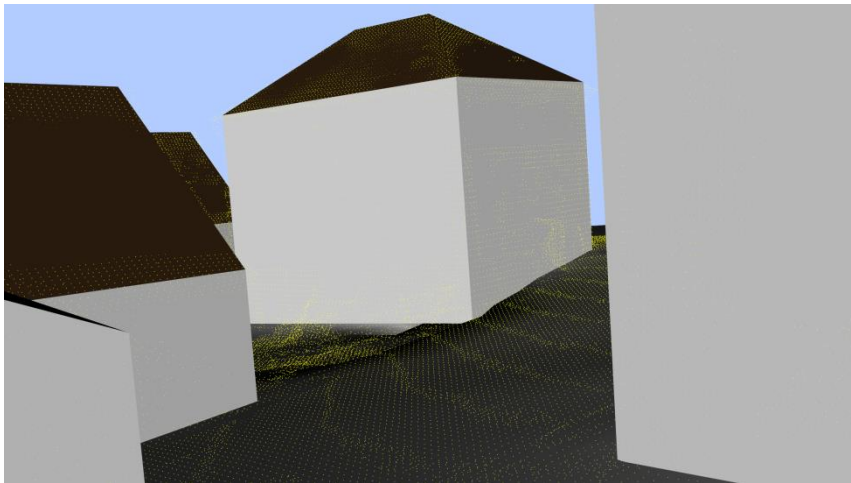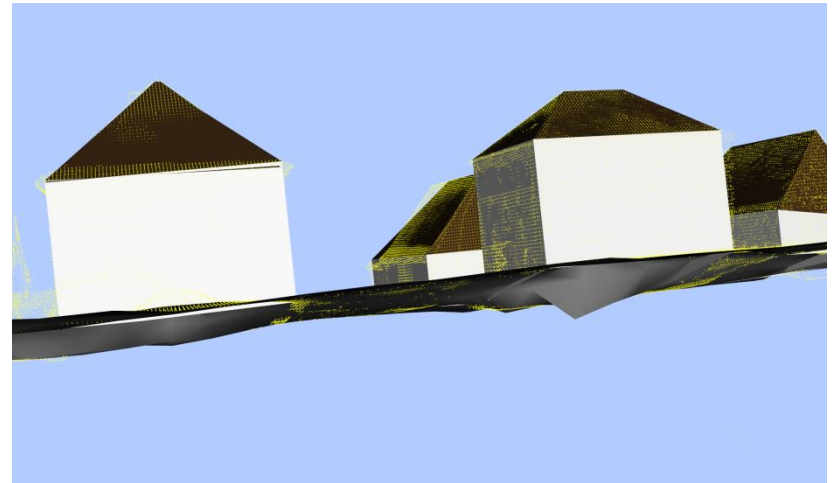

Dataset „Schloß Greifenstein“. Input 64M. noisy 3D points from SfM/MVS. MUSP is limited by scenes with objects exhibiting strong surface curvature. These objects are over-segmented into many tiny pieces as shown below in the red rectangle.

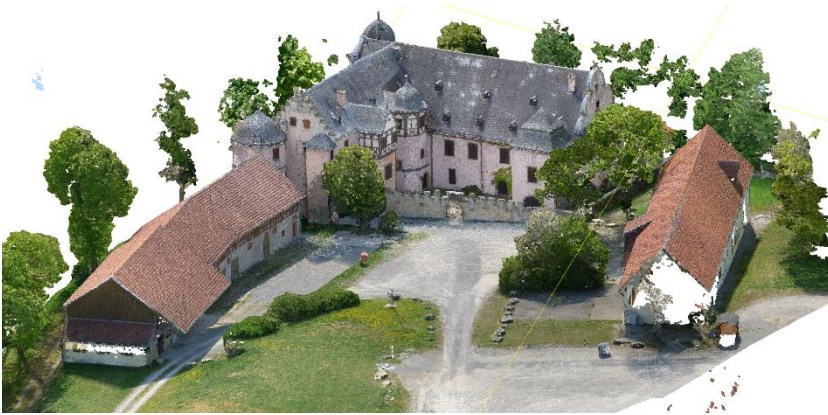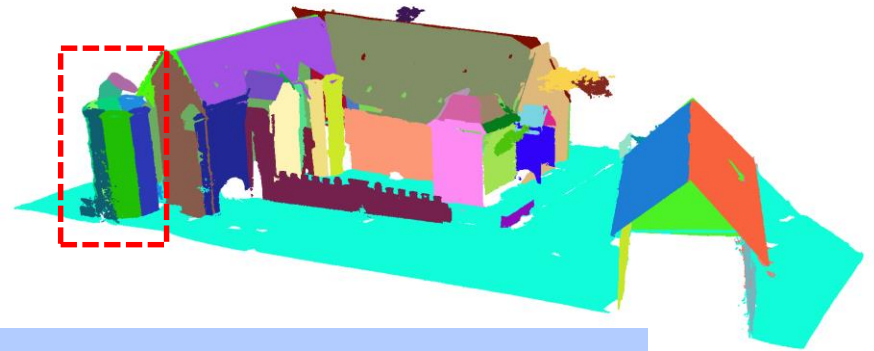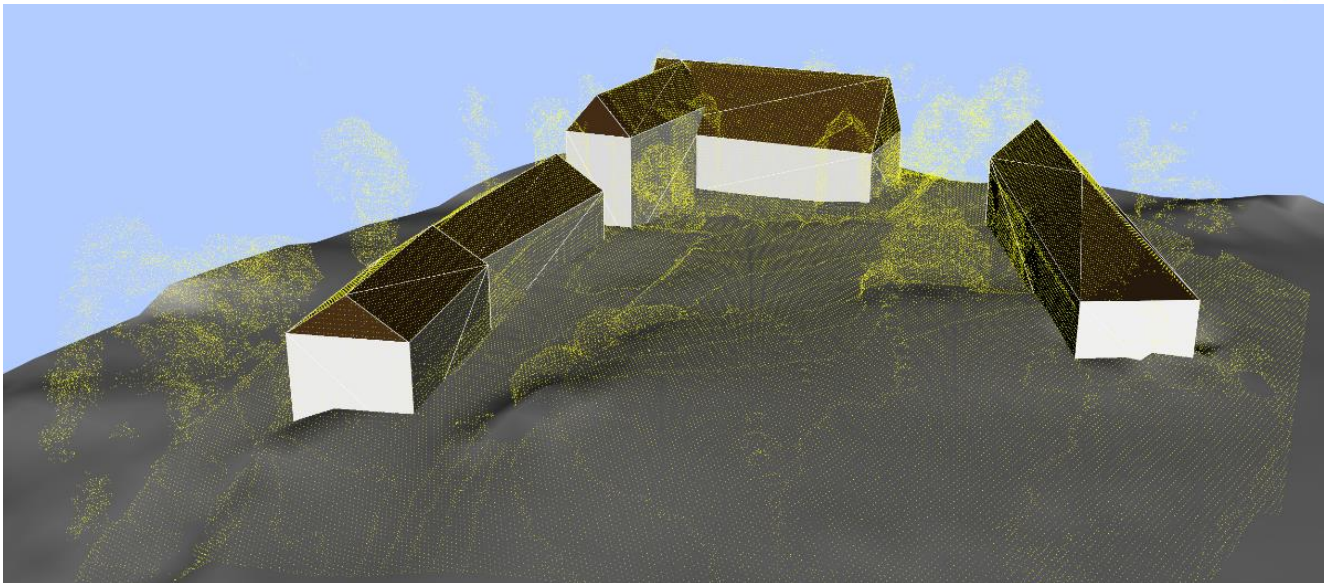

Dataset „Haus43“. Input 76M. noisy 3D points from SfM/MVS. Scene segmentation for a non-planar scene.

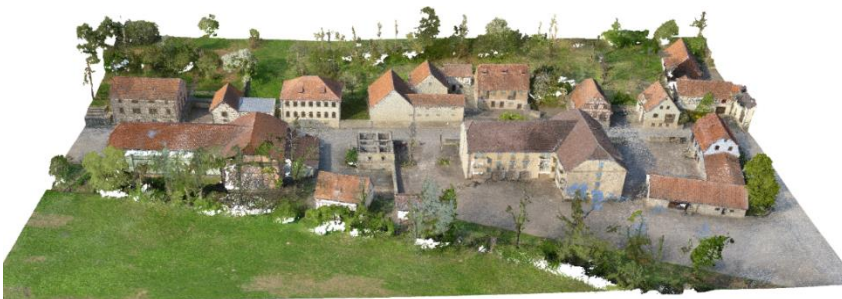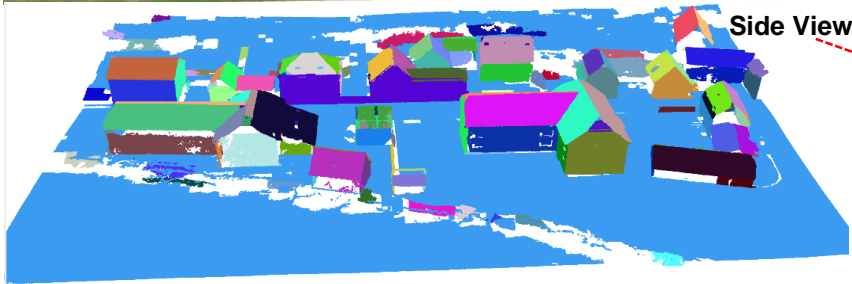

Side View

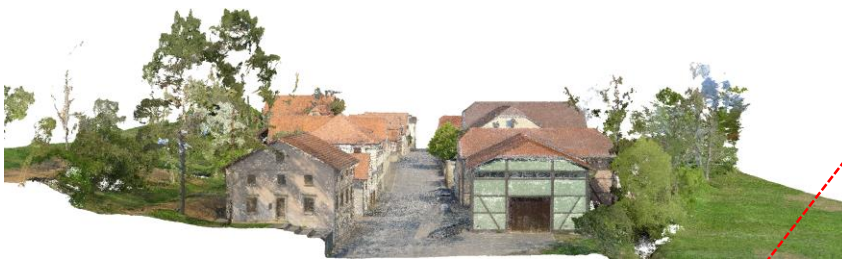

Front View

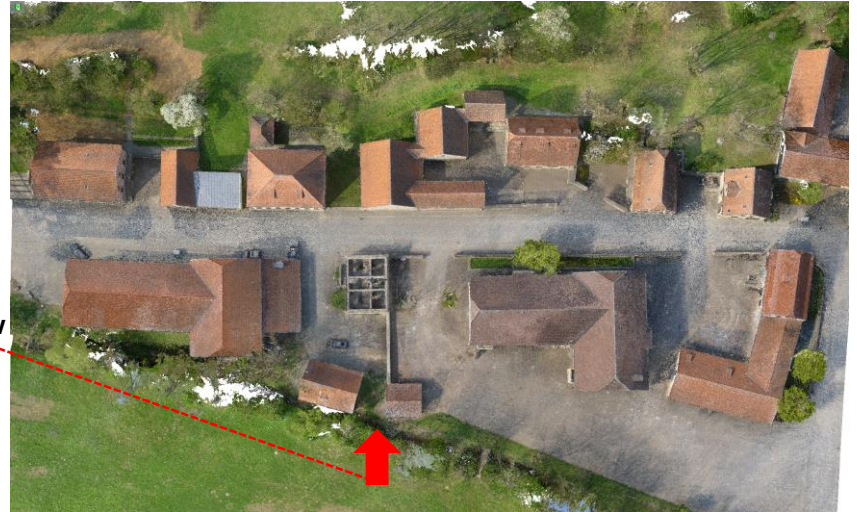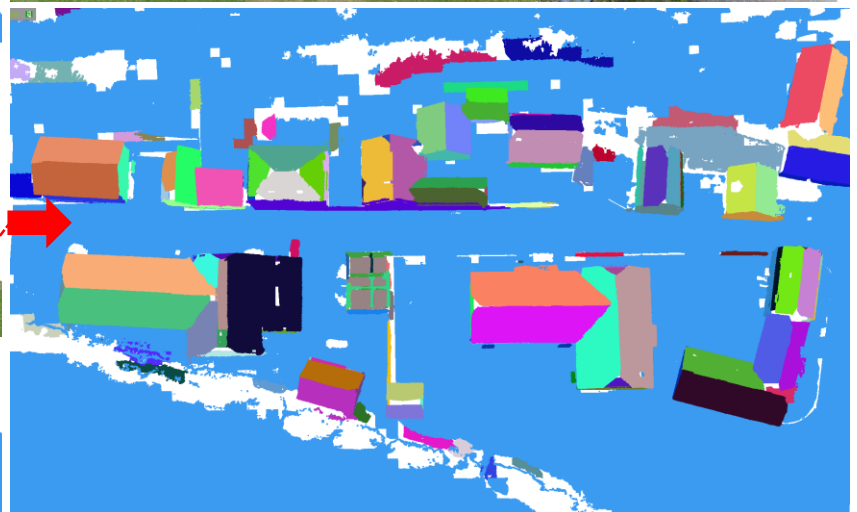

Dataset „Bonnland“. Input 107M. noisy 3D points from SfM/MVS. Model fit for residential area with over 70 buildings having quadrilateral footprints accurately modeled. Runtime: 2Hrs, current code not yet optimized (all colors are randomly choosen)

Segmentation:

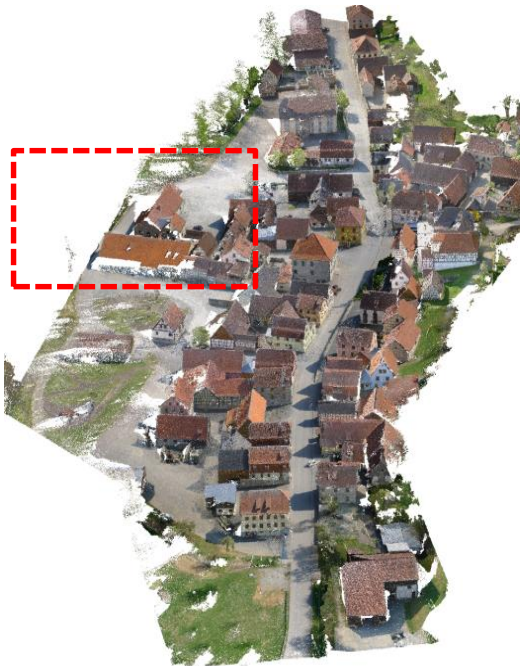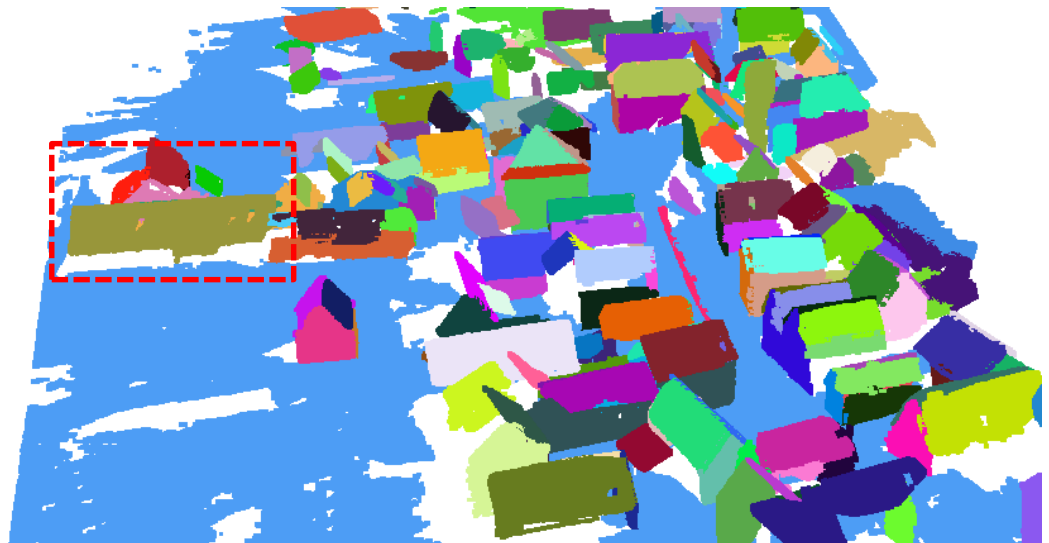

Extracted Ground:

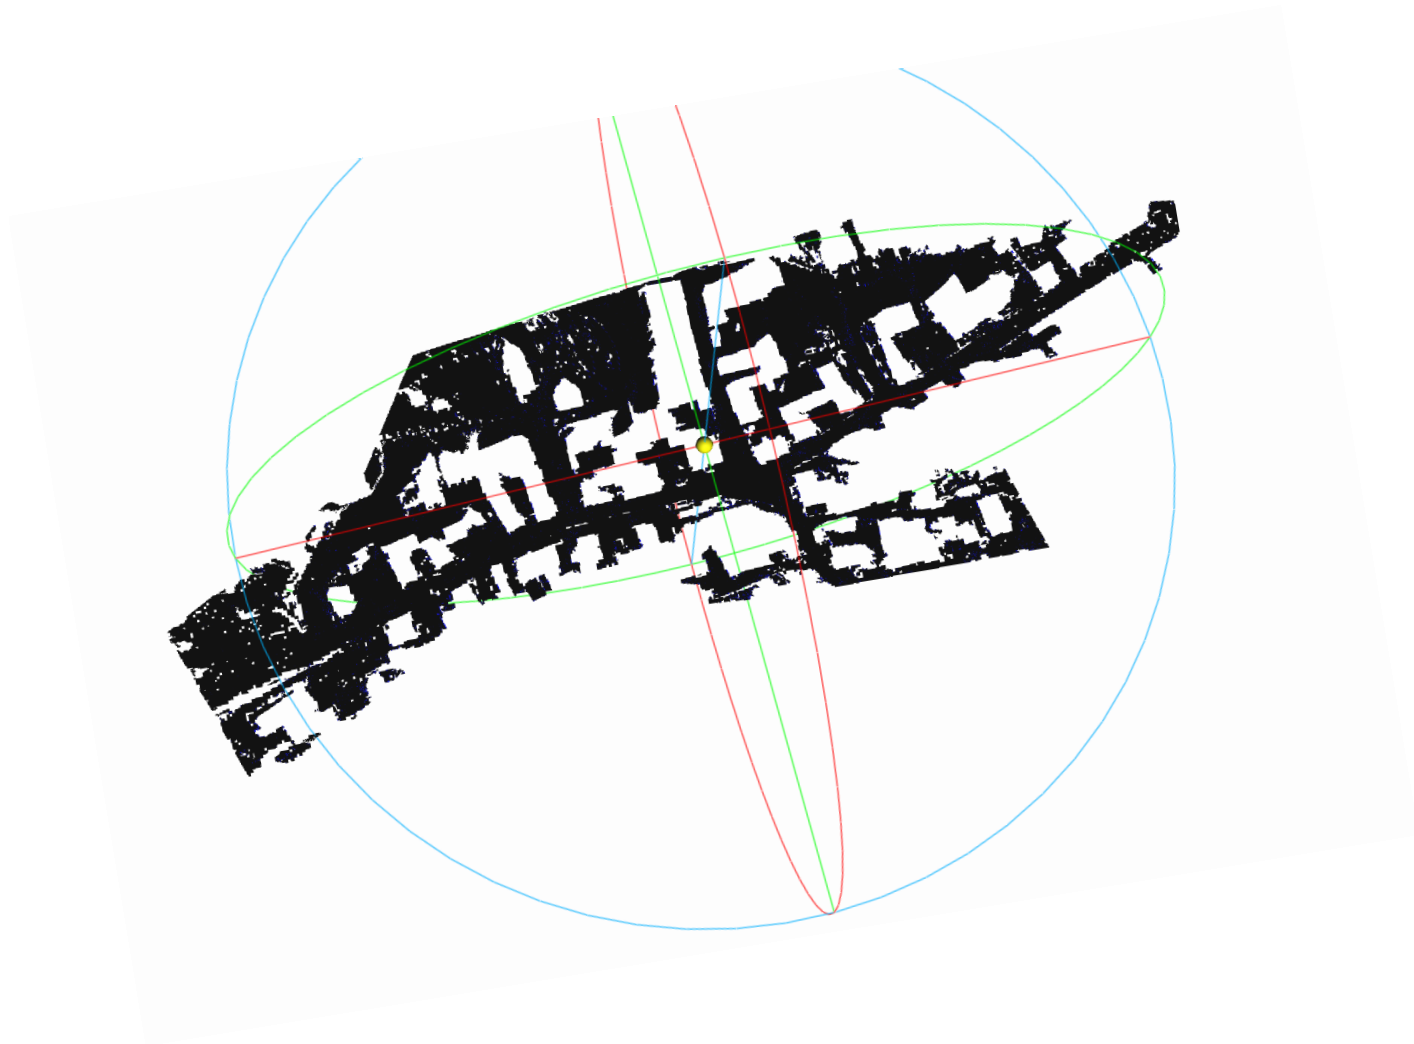

Detected Roofs:

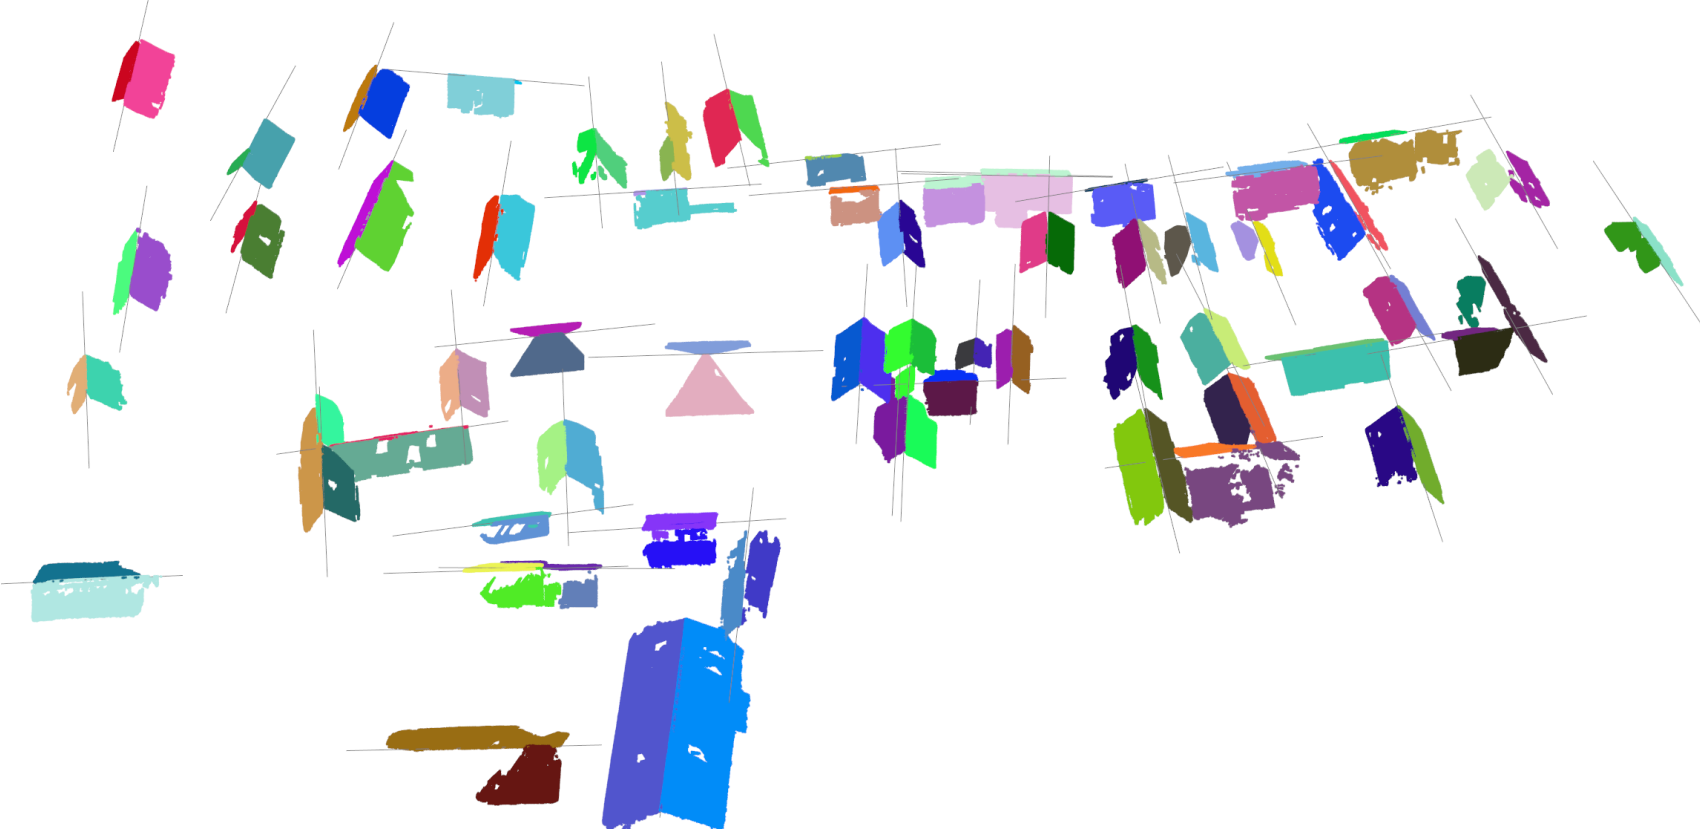

## Model fit

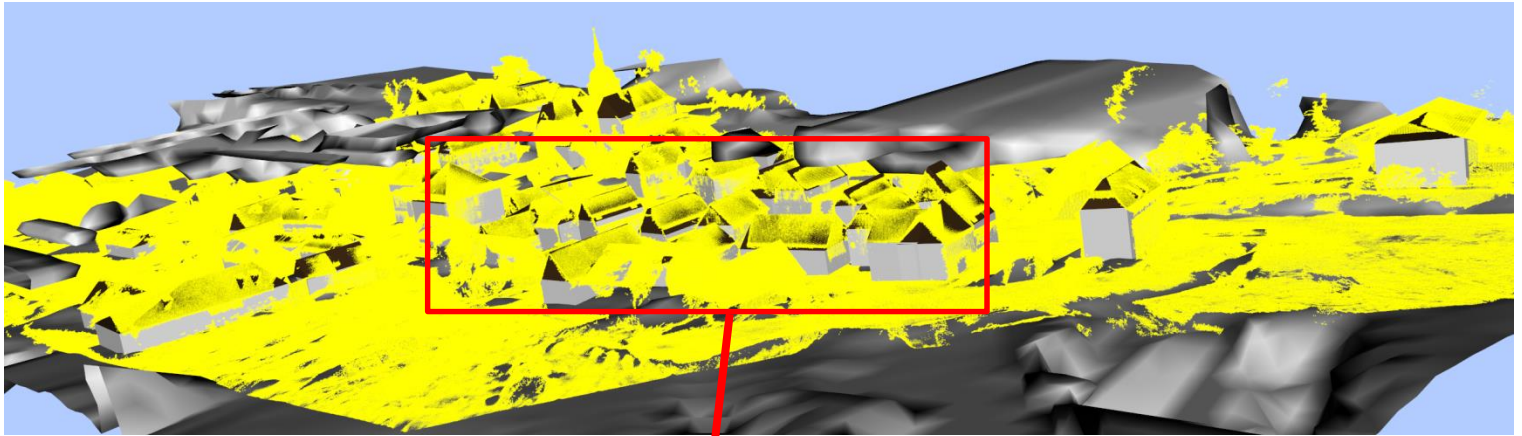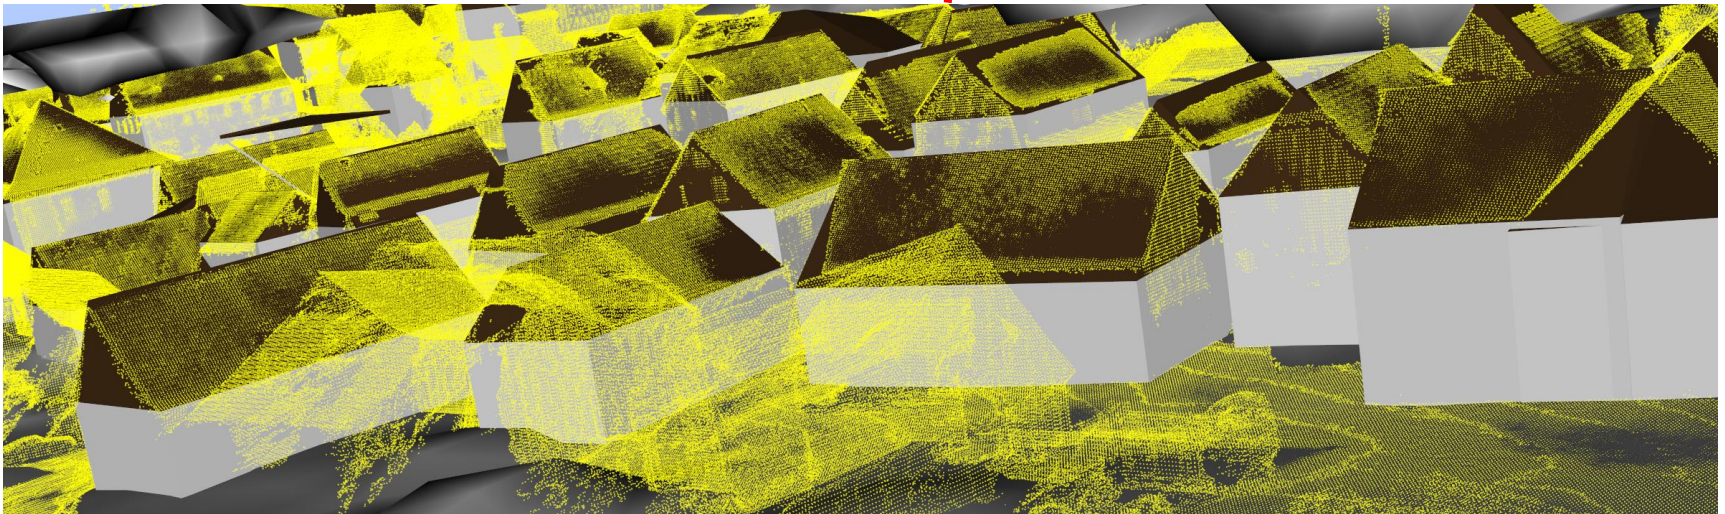

Model fit in wireframe mode showing uniform tessellation of the NURBS surface for the ground

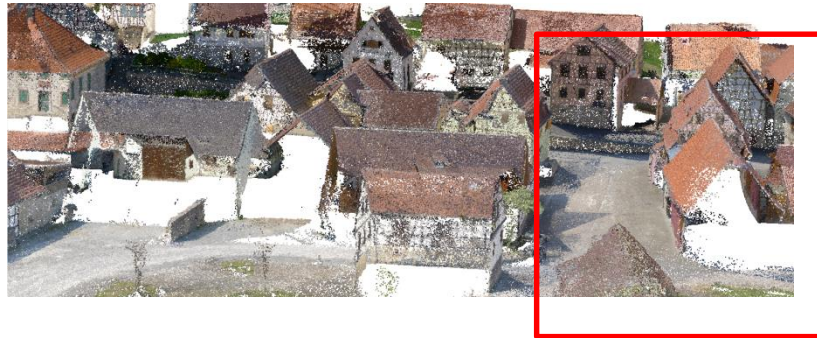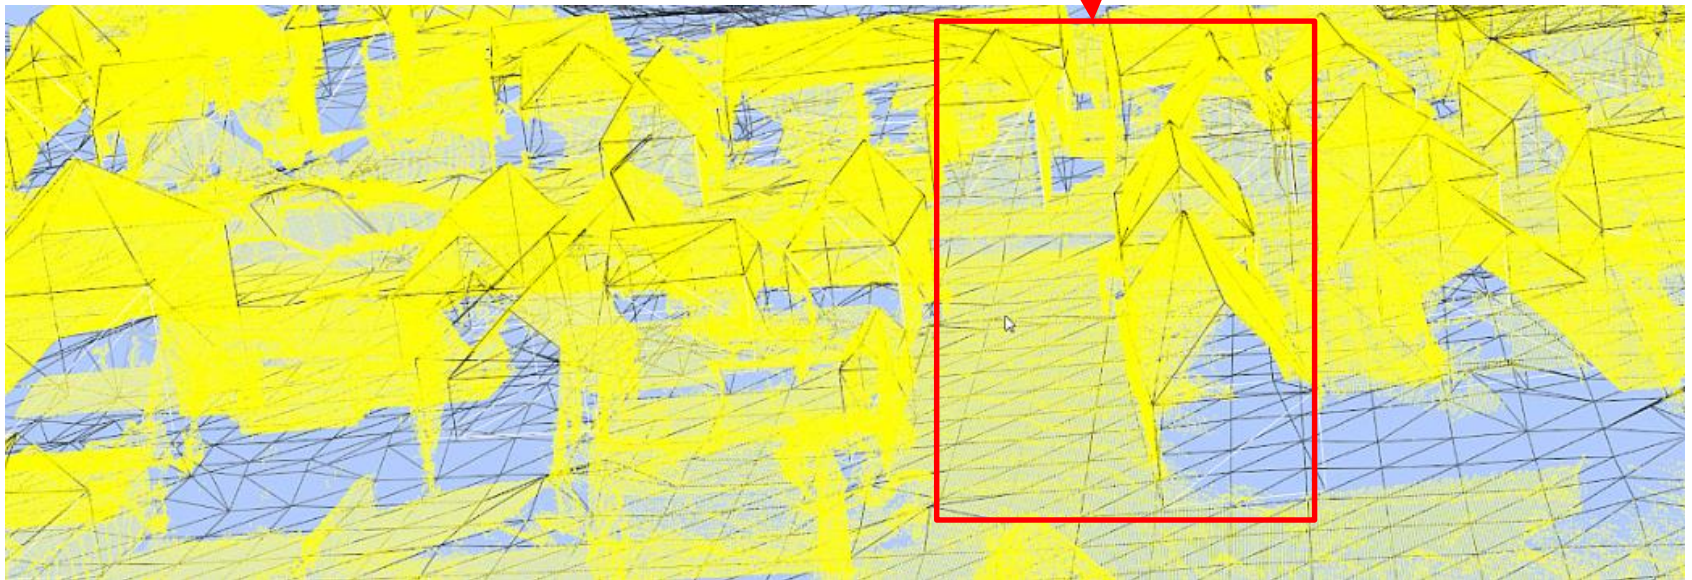

Supplement: Supplementary file 1 [file Nguatem_Modeling_Urban_Scenes_ICCV_2017_supplemental.pdf › 1734-supp/1734-supp.pdf]
