# Supplementary material
Source: ML conference proceedings conference paper supplement (https://openaccess.thecvf.com/content/ICCV_2017/html/Nguatem_Modeling_Urban_Scenes_ICCV_2017_paper.html)
Supplement: Supplementary file 1 [file Nguatem_Modeling_Urban_Scenes_ICCV_2017_supplemental.pdf]

Archive with 2 entries (1 files):
- 1734-supp/
- 1734-supp/1734-supp.pdf
